# Supplementary material for: The EPA Ecosystem Services Tool Selection Portal
Source: MDPI journal article supplement (doi:10.3390/su16051739), 2024-02-20
Supplement: s1 [file s1]

Archive with 1 entries (1 files):
- sustainability-2798110-supplementary.pdf
